# Supplementary material for: Eco-Friendly Epoxy-Terminated Polyurethane-Modified Epoxy Resin with Efficient Enhancement in Toughness
Source: MDPI journal article supplement (doi:10.3390/polym15132803), 2023-06-24
Supplement: s1 [file s1]

*Supporting information*

# **Eco-Friendly Epoxy-Terminated Polyurethane-Modified Epoxy Resin with Efficient Enhancement in Toughness**

**Kun Zhang, Jinrui Huang \*, Yigang Wang, Wenbin Li and Xiaoan Nie \***

Key Laboratory of Biomass Energy and Material, Jiangsu Province, Co-Innovation Center of Efficient Processing and Utilization of Forest Resources, Key Laboratory of Chemical Engineering of Forest Products, National Forestry and Grassland Administration, National Engineering Research Center for Low-Carbon Processing and Utilization of Forest Biomass, Institute of Chemical Industry of Forest Products, Chinese Academy of Forestry, Nanjing 210042, China

\* Correspondence: [huangjinruihu@126.com](mailto:huangjinruihu@126.com) (J.H.); [niexiaoan@icifp.cn](mailto:niexiaoan@icifp.cn) (X.N.)

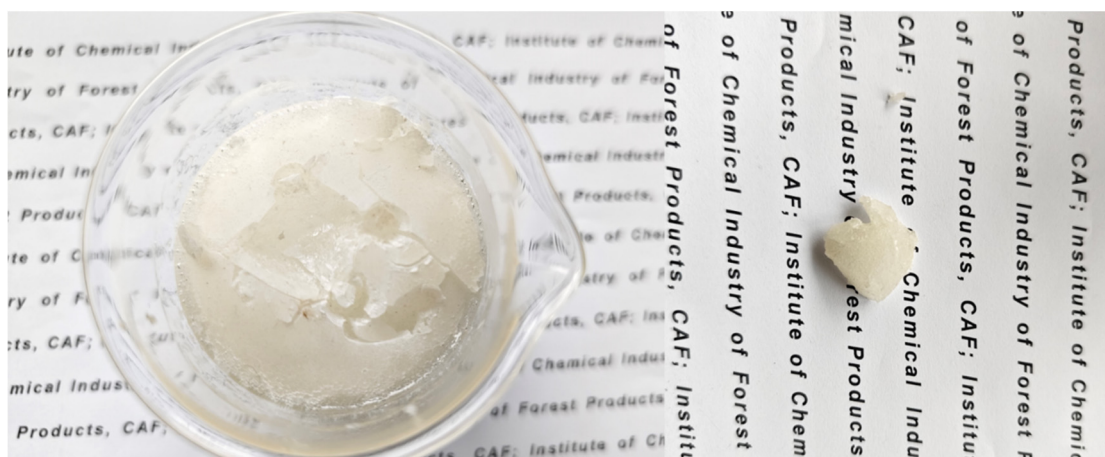

**Figure S1.** Photograph of epoxy with 50 wt % ITPU. Liquid epoxy resin quickly transferred into a solid after the addition of 50 wt % ITPU.

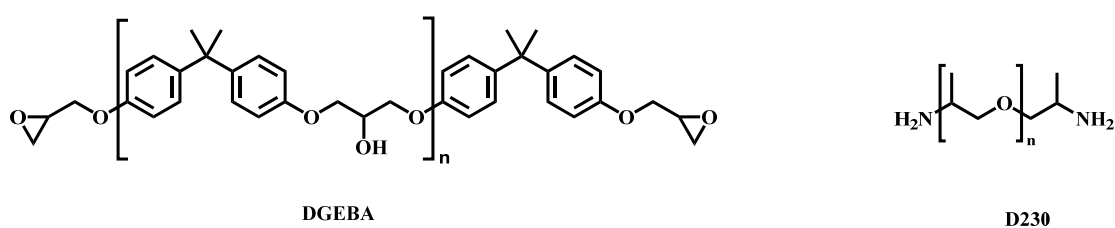

**Figure S2.** Chemical structures of DGEBA and D230.

**Table S1** Mechanical properties of cured epoxy samples

| Sample | Elongation at break (%) | Toughness (MJ·m <sup>-3</sup> ) | Tensile strength (MPa) | Young's modulus (MPa) | Flexural strength (MPa) |
|--------|-------------------------|---------------------------------|------------------------|-----------------------|-------------------------|
| EP     | 6.58±0.23               | 3.29±0.24                       | 62.75±1.16             | 3222±116              | 117.9±1.3               |
| EPU10  | 11.02±0.37              | 4.22±0.36                       | 50.11±1.00             | 2695±90               | 96.7±1.8                |
| EPU20  | 17.22±0.55              | 4.81±0.40                       | 34.06±1.14             | 2119±100              | 74.1±0.9                |
| EPU30  | 30.16±0.77              | 5.31±0.41                       | 19.32±0.73             | 1325±77               | 45.3±0.6                |
| EPU50  | 55.42±1.36              | 5.71±0.48                       | 13.16±0.49             | 403±48                | 17.0±0.5                |
| ITPU10 | 5.54±0.42               | 3.05±0.20                       | 69.31±1.55             | 3004±61               | 109.6±1.5               |
